# Supplementary material for: Integrating pathway elucidation with yeast engineering to produce polpunonic acid the precursor of the anti-obesity agent celastrol
Source: PubMed Central journal article supplement (PMC6988343; doi:10.1186/s12934-020-1284-9), 2020-01-28
Supplement: 12934_2020_1284_MOESM1_ESM.pdf [file 12934_2020_1284_MOESM1_ESM.pdf]

## Additional file 1

**Table S1. Clone and primer list.**

X = deoxyuracil  
 F = forward primer  
 R = reverse primer  
 UF = USER compatible forward primer  
 UR = USER compatible reverse primer  
 leaf = amplified from leaf from leaf derived cDNA

Clones only listed with UF and UR, were amplified from cDNA using these primers

Clones list with F, R, UF and UR, were amplified from cDNA using F and R primers

| Type | Gene     | Family | Clan    | Primer type | Sequence                                 |
|------|----------|--------|---------|-------------|------------------------------------------|
| OSCs | OSC1     |        |         | F           | ATGTGGAGGCTAAAGATTGCAGAGG                |
|      |          |        |         | R           | CTGCTAGACTTTGGAAGATAATGTTACTCTC          |
|      |          |        |         | UF          | GGCTTAAXATGTGGAGGCTAAAGATTGCAGA          |
|      |          |        |         | UR          | GGTTAAXGCTAGACTTTGGAAGATAATGTTACTCTC     |
|      | OSC2     |        |         | F           | ATGTGGAGGCTAAAGATTGCAGAGG                |
|      |          |        |         | R           | TTAGGCATCAGAAGGTAGAGGAAGCAG              |
|      |          |        |         | UF          | GGCTTAAXATGTGGAGGCTAAAGATTGCAGA          |
|      |          |        |         | UR          | GGTTAAXTTAGGCATCAGAAGGTAGAGGAA           |
|      | OSC3     |        |         | F           | ATGTGGAGGCTTAAGGTGGGCGA                  |
|      |          |        |         | R           | GGACTGGGCATTGGTCTAGCATTAC                |
|      |          |        |         | UF          | GGCTTAAXATGTGGAGGCTTAAGGTGGG             |
|      |          |        |         | UR          | GGTTAAXTGGGCATTGGTCTAGCATTAC             |
|      | OSC4     |        |         | F           | ATGTGGAAGATAAAGATAGCTGAACGTGG            |
|      |          |        |         | R           | TCATTGCAATTTAATTCCTTTGAAGGCAACT          |
|      |          |        |         | UF          | GGCTTAAXATGTGGAAGATAAAGATAGCTGAACG       |
|      |          |        |         | UR          | GGTTAAXTCATTGCAATTTAATTCCTTTGAAGGC       |
| CYPs | CYP712K1 | CYP712 | 71 clan | F           | CCTTCTCGCAATCTCCAAT                      |
|      |          |        |         | R           | CCTTAGTTTTCTGCTTAACCG                    |
|      |          |        |         | UF          | GGCTTAAXATGGCCACCATCACTGACATCCAATACT     |
|      |          |        |         | UR          | GGTTAAXTTAACCGCAAATGGATTGAAACGAACGACCCGG |
|      | CYP712K2 | CYP712 | 71 clan | F           | GCCTAAACCACTCTAATAAGCCA                  |
|      |          |        |         | R           | AACCACAGCTTATCTCCAACCATC                 |
|      |          |        |         | UF          | GGCTTAAXATGGCCACTACCATCATTGACGTCCAAT     |
|      |          |        |         | UR          | GGTTAAXTTAGGAAGAAAATGGATCAAATCGGACGATTGG |

(Table S1 continued)

| Type | Gene        | Family | Clan    | Primer type | Sequence                                                    |
|------|-------------|--------|---------|-------------|-------------------------------------------------------------|
|      | CYP712K3    | CYP712 | 71 clan | F           | CGATAAGCCTAAACCACTCTAATAAGCCA                               |
|      |             |        |         | R           | GCAAGAAAAGGGATGGAATCGGAGA                                   |
|      |             |        |         | UF          | GGCTTAAXATGGCCACCACTACCATCATTGAC                            |
|      |             |        |         | UR          | GGTTAAXTTAGCAAGAAAAGGGATGGAATCGGAGA                         |
|      |             |        |         |             | ATGGATCTTGTTATGTTAATGCATAAATCAAATCAATTTTATGCCATCTCTGCTCTTTG |
|      | CYP71AN56   | CYP71  | 71 clan | F           | GAGGAGATCAATGAGAATGC                                        |
|      |             |        |         | R           | GAGGAGATCAATGAGAATGC                                        |
|      |             |        |         | UF          | GGCTTAAXATGGATCTTGTTATGTTAATGCATAAAT                        |
|      |             |        |         | UR          | GGTTAAXTTAATGAGAATGCATTAGTGGGACAAGATTAAG                    |
|      | CYP71AP40   | CYP71  | 71 clan | F           | TAATGCTGCCTTCCTTCAGT                                        |
|      |             |        |         | R           | GGTGATTTATTGTCTTAGGGG                                       |
|      |             |        |         | UF          | GGCTTAAXATGCTGCCTTCCTTCAGTTGCTGATCC                         |
|      |             |        |         | UR          | GGTTAAXTTAGGGGAACCATGGTTTGGCAACAACAATCAG                    |
|      | CYP71B102   | CYP71  | 71 clan | F           | AGACGTAGCATAGTACCATTC                                       |
|      |             |        |         | R           | GTGTATCTACGAGTAACTTCAGC                                     |
|      |             |        |         | UF          | GGCTTAAXATGGCTCTGCATACCTTAGCAA                              |
|      |             |        |         | UR          | GGTTAAXTTAGCTTGTGTTATTTACTGGTAATGAC                         |
|      | CYP71E23    | CYP71  | 71 clan | F           | TACACGGCTCACTTCTTGTT                                        |
|      |             |        |         | R           | ACTTGATACTCCACCGTATG                                        |
|      |             |        |         | UF          | GGCTTAAXATGGCCATCATTTCACAAACA                               |
|      |             |        |         | UR          | GGTTAAXTTAACAGAGCCCTATATCCTTCG                              |
|      | CYP71BE86   | CYP71  | 71 clan | F           | CAGTAACCACTCACACCTATCTC                                     |
|      |             |        |         | R           | CCAGTATGGAACCTTGTGCTTG                                      |
|      |             |        |         | UF          | GGCTTAAXATGGATCTCCAACCTCCGTCCTTCCCGA                        |
|      |             |        |         | UR          | GGTTAAXTTAACCGGAGAGCGAGCGATAAAGGAGTTGGAAC                   |
|      | CYP71BE85v1 | CYP71  | 71 clan | F           | CCTCATGGACCTCCTACAAT                                        |
|      |             |        |         | R           | AAGGGAGATAAACTGCTAC                                         |
|      |             |        |         | UF          | GGCTTAAXATGGACCTCCTACAATTTCCATCGGTCT                        |
|      |             |        |         | UR          | GGTTAAXTTAGTTAAAGGCAGGTGAAGGACAATAAGGAGT                    |
|      | CYP71BE84   | CYP71  | 71 clan | F           | CCATCATGGATCATCACCTTACT                                     |
|      |             |        |         | R           | GTCGTAATATAGGGGAACATCAC                                     |
|      |             |        |         | UF          | GGCTTAAXATGGATCATCACCTTACTTCTTTCCAC                         |
|      |             |        |         | UR          | GGTTAAXTTACTTGTTTTCTCAACAACAGAGGACTTATA                     |
|      | CYP71BE83   | CYP71  | 71 clan | F           | TCATCATGGATCTTCAGTTTTC                                      |
|      |             |        |         | R           | CACTCTAGTTTCATTCACTCG                                       |
|      |             |        |         | UF          | GGCTTAAXATGGATCTTCAGTTTTCTTCTTTCCGG                         |
|      |             |        |         | UR          | GGTTAAXTTACTCGACAATTTGGGATGATAAGGAATTGG                     |
| leaf | CYP71BE85v2 | CYP71  | 71 clan | UF          | GGCTTAAXATGGACCTCCTACAATTTCCATCGGTCT                        |
|      |             |        |         | UR          | GGTTAAXTTAGTTAAAGGCAGGTGAAGGACAATAAGGAGT                    |
|      | CYP76T30    | CYP76  | 71 clan | F           | AGGAAGTGCTAGGAACAGAC                                        |
|      |             |        |         | R           | CACACATGCATTGCCATTTAG                                       |
|      |             |        |         | UF          | GGCTTAAXATGGACTACTTTACGCTATTAGCGCTGA                        |
|      |             |        |         | UR          | GGTTAAXTTATACTTGGATAGGGACAGCCAGGAGAGGAAG                    |

(Table S1 continued)

| Type | Gene      | Family | Clan     | Primer type | Sequence                                  |
|------|-----------|--------|----------|-------------|-------------------------------------------|
|      | CYP76Y20  | CYP76  | 71 clan  | F           | CCTTCCATGCTCTCATCCATAC                    |
|      |           |        |          | R           | ATTGACACACCATTGCT                         |
|      |           |        |          | UF          | GGCTTAAXATGGAACCTCACATCTTCCTTTCTGCC       |
|      |           |        |          | UR          | GGTTAAXTTAATTGTTATTGGCTTGGATGGGGATAGCACA  |
|      | CYP711A62 | CYP711 | 711 clan | F           | GCGAATGTTCTGCTACTATCTTCA                  |
|      |           |        |          | R           | CACTACTCTAAGCTTTACACCATGCCT               |
|      |           |        |          | UF          | GGCTTAAXATGGAGTTAGTGGGTGTAGAGTTTTTC       |
|      |           |        |          | UR          | GGTTAAXTCATTCTAGAAAGATCACTACTCTAAGCTTTACA |
|      | CYP81AM1  | CYP81  | 71 clan  | F           | CATGGAAACCCTTCACTACTTGGGTC                |
|      |           |        |          | R           | AGTGTGCACACACACGCAGATA                    |
|      |           |        |          | UF          | GGCTTAAXATGGAAACCCTTCACTACTTGGGTCTCT      |
|      |           |        |          | UR          | GGTTAAXTTATAGGTGGGAAAGTGC GCGGTGAGAGGCTG  |
|      | CYP82C61  | CYP82  | 71 clan  | F           | GCTCTCCAGATGGAGTTTCTTC                    |
|      |           |        |          | R           | ACAAACCAGCAACACAAAGTAAAC                  |
|      |           |        |          | UF          | GGCTTAAXATGGAGTTTCTTCTTCACTTCCAACAA       |
|      |           |        |          | UR          | GGTTAAXTTACCCCATATAGAGATGACTTGAAGGCGTGG   |
|      | CYP82AS1  | CYP82  | 71 clan  | F           | GTCACATGCTTTGCTTCCGTA                     |
|      |           |        |          | R           | CTCCTTAAGCAGAAAACAGTAACA                  |
|      |           |        |          | UF          | GGCTTAAXATGCTTTGCTTCCGTAGCCCCAAGCCCT      |
|      |           |        |          | UR          | GGTTAAXTTAGTGTACGTAAAGCTTAGGATCAAGACGCGG  |
|      | CYP82D166 | CYP82  | 71 clan  | F           | CTGTTACAATGATTCCCCTCTGTC                  |
|      |           |        |          | R           | TGACGGTAAGGAATAGCCCTAGGT                  |
|      |           |        |          | UF          | GGCTTAAXATGATTCCCCTTCTGCCATACCTGAATA      |
|      |           |        |          | UR          | GGTTAAXTTATTCATAGGCAGTAGGAGACAAGCGAGGTCT  |
|      | CYP82D169 | CYP82  | 71 clan  | F           | GCTGCAACCATGGAGTACTCAA                    |
|      |           |        |          | R           | AACACAAATGGCAAGTGGCAACA                   |
|      |           |        |          | UF          | GGCTTAAXATGGAGTACTCAATTACCACCATTGGAG      |
|      |           |        |          | UR          | GGTTAAXTTAATTATAAAGGTGGGTAGGGAGGCGAGGCGA  |
|      | CYP82C60  | CYP82  | 71 clan  | F           | TAACCATCAGCACTCCTGT                       |
|      |           |        |          | R           | CTCCTCTCTCAAACCACAT                       |
|      |           |        |          | UF          | GGCTTAAXATGTCCATACACTTACAGCTCACAACAA      |
|      |           |        |          | UR          | GGTTAAXTTATCCATATAAATGAGGTGGGAGACGTGGACT  |
|      | CYP82J13  | CYP82  | 71 clan  | F           | CTCACGATCATGGATTTCCC                      |
|      |           |        |          | R           | TTTTCCCTTCCAATTTAGCTT                     |
|      |           |        |          | UF          | GGCTTAAXATGGATTTCCCTTCCAATCTAACAGCAA      |
|      |           |        |          | UR          | GGTTAAXTTAATAGAGATCAGAACAAAGTCTTGACTGAC   |
|      | CYP82D168 | CYP82  | 71 clan  | F           | CTAGGCAATAGAAACCATGGAATC                  |
|      |           |        |          | R           | TCCTAACGTAGGCATATTGACAC                   |
|      |           |        |          | UF          | GGCTTAAXATGGAATCTTCTCTCTCCTCAGGTAC        |
|      |           |        |          | UR          | GGTTAAXTTAATCATACAGGTGGGCTGGGTGGCGTGGACT  |
| leaf | CYP82AQ1  | CYP82  | 71 clan  | UF          | GGCTTAAXATGGATTTTGCCTACCATTGCCACAA        |
|      |           |        |          | UR          | GGTTAAXTTAAGCATAAAGGTGGGCAGGAAGGCGTGGAGT  |

(Table S1 continued)

| Type | Gene      | Family | Clan     | Primer type | Sequence                                   |
|------|-----------|--------|----------|-------------|--------------------------------------------|
| leaf | CYP82D167 | CYP82  | 71 clan  | UF          | GGCTTAAXATGGCAGACAAGTGC GGCCCAATCTCA       |
|      |           |        |          | UR          | GGTTTAAAXTTAGGTGCTAGTACTCCAATTATCCATATAGAG |
|      | CYP701A58 | CYP701 | 71 clan  | F           | ATGGCGGCTCCAACCTCTTCT                      |
|      |           |        |          | R           | TCAATTTCTTGGCTTTATCATTGCGTGCAAC            |
|      |           |        |          | UF          | GGCTTAAXATGGCGGCTCCAACCTCTTCT              |
|      |           |        |          | UR          | GGTTTAAXTCAATTTCTTGGCTTTATCATTGCGTGCAAC    |
|      | CYP72D19  | CYP72  | 72 clan  | F           | ACATGGAAGGCTTGATTGTG                       |
|      |           |        |          | R           | CCTCAAAGCGGGTGAAGGATAA                     |
|      |           |        |          | UF          | GGCTTAAXATGGAAGGCTTGATTGTGCAAACGATGT       |
|      |           |        |          | UR          | GGTTTAAAXTTAAAGCGGGTGAAGGATAATGGGAGCTCCATG |
|      | CYP76A55  | CYP72  | 72 clan  | F           | TCCGCTTGCTCCAGAATGGTTT                     |
|      |           |        |          | R           | TGGGGTAGGCCACACAATCAT                      |
|      |           |        |          | UF          | GGCTTAAXATGGTTTGCCTCTGTAGTTGGTTTGT         |
|      |           |        |          | UR          | GGTTTAAAXTTACATGATTCGTTTCTTTGGTATTAGTTTCAA |
|      | CYP711A61 | CYP711 | 711 clan | F           | CATGGAATTTGTGGGTGTAACGTG                   |
|      |           |        |          | R           | TCATGTTCTATTCACTACTCTAAGCTTTACAC           |
|      |           |        |          | UF          | GGCTTAAXATGGAATTTGTGGGTGTAACGTGTA          |
|      |           |        |          | UR          | GGTTTAAAXTCATGTTCTATTCACTACTCTAAGCTTTACAC  |
|      | CYP749A88 | CYP749 | 72 clan  | F           | CCAGTCATGAGCTTAGTAACCC                     |
|      |           |        |          | R           | CAGAGTGACCAATTTAGCCCTTTTA                  |
|      |           |        |          | UF          | GGCTTAAXATGAGCTTAGTAACCCCTAATTGTTGGTC      |
|      |           |        |          | UR          | GGTTTAAAXTTAATTCCCATATCCAACCGTTGAAGGATAAT  |
|      | CYP749A89 | CYP749 | 72 clan  | F           | GCAATGGCCAGTTTAGGGA                        |
|      |           |        |          | R           | CCCAATACAACTCAAATGCAG                      |
|      |           |        |          | UF          | GGCTTAAXATGGCCAGTTTAGGGACCCTAGTTCTTA       |
|      |           |        |          | UR          | GGTTTAAAXTTACTCTACCAGTGGGCGAAGGATTATCTGAAC |
|      | CYP88H2v2 | CYP88  | 85 clan  | F           | CAAAGAGCAAACAATGGGGTTGG                    |
|      |           |        |          | R           | CTACTCAATTTTGTGATTTTGACCAGATAA             |
|      |           |        |          | UF          | GGCTTAAXATGGAATTGACCAACGTCATAGGAT          |
|      |           |        |          | UR          | GGTTTAAAXCTACTCAATTTTGTGATTTTGACCAGATAA    |
|      | CYP88H12  | CYP88  | 85 clan  | F           | ATGGAGTTGTTGAGAGTGTTAGGATG                 |
|      |           |        |          | R           | CAATATCGGTTATTTTGGGAGTTTAGTGA              |
|      |           |        |          | UF          | GGCTTAAXATGGAGTTGTTGAGAGTGTTAGGATGGG       |
|      |           |        |          | UR          | GGTTTAAAXTTATTTTGGGAGCTTAGTGATTTTCACGAGATA |
|      | CYP88A89  | CYP88  | 85 clan  | F           | ATGGAATTGACCAACGTCATAGGAT                  |
|      |           |        |          | R           | GATGAACATTTTGTGATCCTTGCGAC                 |
|      |           |        |          | UF          | GGCTTAAXATGGGGTTGGGGTGGATGGTT              |
|      |           |        |          | UR          | GGTTTAAAXTTACGCAGATGATGAACATTTTGTGATCCTT   |
|      | CYP88H7   | CYP88  | 85 clan  | F           | ATGGAGTACTCAAGCATGTTAGGATT                 |
|      |           |        |          | R           | CACTCGAGAGCTTGATGATTTTGG                   |
|      |           |        |          | UF          | GGCTTAAXATGTTAGGATTGGCTAGCACTCTCA          |
|      |           |        |          | UR          | GGTTTAAAXCTAGAGATCACTCGAGAGCTTGATGATT      |

(Table S1 continued)

| Type | Gene       | Family | Clan    | Primer type | Sequence                                 |
|------|------------|--------|---------|-------------|------------------------------------------|
|      | CYP88H8    | CYP88  | 85 clan | F           | CGCAATTAAGACTAGAGCGAGAGAGAAATAC          |
|      |            |        |         | R           | CCACACGGCTTAATTATTATGATGACACT            |
|      |            |        |         | UF          | GGCTTAAXATGGAGTTATTCAACAACAAGCTAGATTT    |
|      |            |        |         | UR          | GGTTAAXTTATGATGACACTTTGGTGAGTTTCACTA     |
|      | CYP88H11   | CYP88  | 85 clan | F           | ATGGAGTTGTTGAGAGTGTTAGGATG               |
|      |            |        |         | R           | CAATATCGGTTATTTGGGAGTTTAGTGA             |
|      |            |        |         | UF          | GGCTTAAXATGGAGTTGTTGAGAGTGTTAGGATGGG     |
|      |            |        |         | UR          | GGTTAAXTTATTTGGGAGCTTAGTGATTTTCACGAGATA  |
|      | CYP88A88   | CYP88  | 85 clan | UF          | GGCTTAAXATGGAGTTAGGGTCTGTGCTTATATGCA     |
|      |            |        |         | UR          | GGTTAAXTCATGACGAACATTTATTGATCCTCGCC      |
|      | CYP88A44v1 | CYP88  | 85 clan | UF          | GGCTTAAXATGGAGTTAGGGTCTGTGCTTATATGCA     |
|      |            |        |         | UR          | GGTTAAXTCATGACGAACATTTATTGATCCTCGCC      |
|      | CYP88A44v2 | CYP88  | 85 clan | UF          | GGCTTAAXATGGAGTTAGGGTCTGTGCTTATATGCA     |
|      |            |        |         | UR          | GGTTAAXTCATGACGAACATTTATTGATCCTCGCC      |
| leaf | CYP88H6    | CYP88  | 85 clan | UF          | GGCTTAAXATGGAGTATTCAAGCGTGTAGGATTGG      |
|      |            |        |         | UR          | GGTTAAXTTAGAGCTTGATGATTTTGGCAAGAAAGTTGTC |
| leaf | CYP88H1    | CYP88  | 85 clan | UF          | GGCTTAAXATGGAGTATTCAACGACAAGCTAGATT      |
|      |            |        |         | UR          | GGTTAAXTTATGATGATGATACTTTGTGAGTTTCACCAA  |
| leaf | CYP88H10   | CYP88  | 85 clan | UF          | GGCTTAAXATGGAGTTGTTGAGAGTGTTAGGATGGG     |
|      |            |        |         | UR          | GGTTAAXTTATTTGGGAGCTTAGTGATTTTCACGAGATA  |
| leaf | CYP88A43   | CYP88  | 85 clan | UF          | GGCTTAAXATGGAGTTAGGGTCTGTGCTTATATGCA     |
|      |            |        |         | UR          | GGTTAAXTTATGACGAACATTTCTTGATCCTCGCCAAGCA |
|      | CYP88H9    | CYP88  | 85 clan | F           | GATGGCAGATATCTTAGAATTGGTC                |
|      |            |        |         | R           | AGTCCAAGTGGAGCACTTT                      |
|      |            |        |         | UF          | GGCTTAAXATGGCAGATATCTTAGAATTGGTCTTG      |
|      |            |        |         | UR          | GGTTAAXTTATTTGGGAGTTTTGTGATTTTGACGAGATA  |
|      | CYP716C52  | CYP716 | 85 clan | F           | GTTGTGACAAGAATGGGAAAG                    |
|      |            |        |         | R           | AGATTAATTGGCTGAGTGAAGG                   |
|      |            |        |         | UF          | GGCTTAAXATGGGAAAGTACTCCAATGAAGTGTCA      |
|      |            |        |         | UR          | GGTTAAXTTAATTGGCTGAGTGAAGGCGGATTG        |
|      | CYP716E53  | CYP716 | 85 clan | F           | CTCGTCATTCTTAGCCAT                       |
|      |            |        |         | R           | CTTAATTGTCATGAGGCTGT                     |
|      |            |        |         | UF          | GGCTTAAXATGGATCTCCTGTCTCCATACCTTTTTTC    |
|      |            |        |         | UR          | GGTTAAXTTAATTGTCATGAGGCTGTAACGAATTGGAAG  |
|      | CYP86B39   | CYP86  | 86 clan | F           | ACACCATAACATGCTCTAC                      |
|      |            |        |         | R           | GATGAAAGACCATAGTTATTAACA                 |
|      |            |        |         | UF          | GGCTTAAXATGCTCTACAACAACACCACCATGATCA     |
|      |            |        |         | UR          | GGTTAAXTTAATAGTTCATCTAAGGTACTTATGAAGCTC  |
|      | CYP96A145  | CYP96  | 86 clan | F           | CTTAAGTCATGGCCTTATTAGGTC                 |
|      |            |        |         | R           | GAAGGATGATAAGGGACAGCTA                   |
|      |            |        |         | UF          | GGCTTAAXATGGCCTTATTAGGTCCTTCTTAAATCC     |
|      |            |        |         | UR          | GGTTAAXTTAGGCCATCTCTTACTGACCTTCACCTCAA   |

(Table S1 continued)

| Type   | Gene              | Family | Clan | Primer type | Sequence                                                                             |
|--------|-------------------|--------|------|-------------|--------------------------------------------------------------------------------------|
| Others | P <sub>GAL1</sub> |        |      | UF          | CACGCGAXAGTACGGATTAGAAGC                                                             |
|        |                   |        |      | UR          | ACCCGTTGAXGGGTTTTTCTCCT                                                              |
|        | UBC7 pUG-F        |        |      | F           | GAGATTATCCTAAAAGGAACCTCCCTAGTAATAGTGTAATTTGGAAGGGCATA<br>GCCAGCTGAAGCTTCGTACGC       |
|        | pUG-R             |        |      | R           | GTATATAGAGAACAGTTAAAAGGAAGACCAAATGATCATTAACTGCTACCT<br>GCTTTCAGCATAGGCCACTAGTGGATCTG |
|        | UBC7 prom         |        |      | F           | GAAGAACTTACCAGACTGTTTCAAGT                                                           |

**Table S2. Yeast expression constructs**

| <b>name</b>       | <b>backbone</b> | <b>promoter*</b>  | <b>insert</b>                    | <b>source</b>                        |
|-------------------|-----------------|-------------------|----------------------------------|--------------------------------------|
| pESC TRP EV       | pESC TRP        | P <sub>GAL1</sub> |                                  | Agilent Technologies, Cat. #217453   |
| pESC TRP CYP712K1 | pESC TRP        | P <sub>GAL1</sub> | <i>TwCYP712K1</i>                | this study                           |
| pESC TRP CYP712K2 | pESC TRP        | P <sub>GAL1</sub> | <i>TwCYP712K2</i>                | this study                           |
| pESC TRP CYP712K3 | pESC TRP        | P <sub>GAL1</sub> | <i>TwCYP712K3</i>                | this study                           |
| pESC LEU EV       | pESC LEU        | P <sub>GAL1</sub> |                                  | Agilent Technologies, Cat. #217452   |
| pESC LEU TwCPR1   | pESC LEU        | P <sub>GAL1</sub> | <i>TwCPR1</i>                    | this study                           |
| pUUS EV           | pUUS            |                   |                                  | Jensen et al., 2014 <sup>75, a</sup> |
| pUUS KdFRS        | pUUS            | P <sub>GAL1</sub> | P <sub>GAL1</sub> , <i>KdFRS</i> | this study                           |
| pHTDH EV          | pHTDH           | P <sub>TDH3</sub> |                                  | Triikka et al., 2015 <sup>50</sup>   |
| pHTD-tHMGR2       | pHTDH           | P <sub>TDH3</sub> | <i>tHMGR2</i>                    | Triikka et al., 2015 <sup>50</sup>   |

\*Promoter included in backbones except for pUUS.

<sup>a</sup>Citation numbers correspond to references in the main article.

Table S3. Assigned <sup>1</sup>H and <sup>13</sup>C NMR peaks for compound 5 and 6

| Position | Compound 5                                      |                     | Compound 6                                      |                     |
|----------|-------------------------------------------------|---------------------|-------------------------------------------------|---------------------|
|          | <sup>1</sup> H NMR                              | <sup>13</sup> C NMR | <sup>1</sup> H NMR                              | <sup>13</sup> C NMR |
|          | $\delta_H$ ( <i>J</i> in Hz)                    | $\delta_C$          | $\delta_H$ ( <i>J</i> in Hz)                    | $\delta_C$          |
| 1        | 1.66 (m, H- $\beta$ )<br>1.94 (m, H- $\alpha$ ) | 22,4                | 1.64 (m, H- $\beta$ )<br>1.92 (m, H- $\alpha$ ) | 22,4                |
| 2        | 2.28 (m, H- $\alpha$ )<br>2.36 (m, H- $\beta$ ) | 41,4                | 2.24 (m, H- $\alpha$ )<br>2.31 (m, H- $\beta$ ) | 41,5                |
| 3        |                                                 | 213,3               |                                                 | 214,4               |
| 4        | 2.22 (q, <i>J</i> = 6.5)                        | 58,4                | 2.2 (q, <i>J</i> = 6.5)                         | 58,2                |
| 5        |                                                 | 42,3                |                                                 | 42,2                |
| 6        | 1.27 (m, H- $\beta$ )<br>1.72 (m, H- $\alpha$ ) | 41,7                | 1.23 (m, H- $\beta$ )<br>1.68 (m, H- $\alpha$ ) | 41,2                |
| 7        | 1.38 (m, H- $\beta$ )<br>1.46 (m, H- $\alpha$ ) | 18,4                | 1.28 (m, H- $\beta$ )<br>1.43 (m, H- $\alpha$ ) | 18,2                |
| 8        | 1.38 (m)                                        | 53,5                | 1.33 (m)                                        | 50,6                |
| 9        |                                                 | 37,6                |                                                 | 37,5                |
| 10       | 1.51 (m)                                        | 59,6                | 1.49 (m)                                        | 59,5                |
| 11       | 1.25 (m, H- $\beta$ )<br>1.45 (m, H- $\alpha$ ) | 35,8                | 1.25 (m, H- $\beta$ )<br>1.40 (m, H- $\alpha$ ) | 35,2                |
| 12       | 1.13 (m, H- $\beta$ )<br>1.45 (m, H- $\alpha$ ) | 29,9                | 1.16 (m, H- $\beta$ )<br>1.48 (m, H- $\alpha$ ) | 30,4                |
| 13       |                                                 | 39,6                |                                                 | 39,3                |
| 14       |                                                 | 38,4                |                                                 | 39,3                |
| 15       | 1.26 (m, H- $\beta$ )<br>1.51 (m, H- $\alpha$ ) | 32,9                | 1.28 (m, H- $\beta$ )<br>1.43 (m, H- $\alpha$ ) | 29,8                |
| 16       | 1.30 (m, H- $\beta$ )<br>1.51 (m, H- $\alpha$ ) | 36                  | 1.34 (m, H- $\beta$ )<br>1.61 (m, H- $\alpha$ ) | 36,2                |
| 17       |                                                 | 29,9                |                                                 | 30,1                |
| 18       | 1.59 (m)                                        | 42                  | 1.5 (m)                                         | 44,3                |
| 19       | 1.34 (m)                                        | 30,7                | 1.45 (m)                                        | 29,5                |
| 20       |                                                 | 33,2                |                                                 | 40,4                |
| 21       | 1.34 (m)                                        | 27,9                | 1.28 (m)                                        | 29,4                |
| 22       | 0.97 (m, H- $\beta$ )<br>1.40 (m, H- $\alpha$ ) | 39,6                | 0.91 (m, H- $\beta$ )<br>1.92 (m, H- $\alpha$ ) | 36,8                |
| 23       | 0.85 (d, <i>J</i> = 6.5 Hz)                     | 6,9                 | 0.80 (d, <i>J</i> = 6.5 Hz)                     | 6,7                 |
| 24       | 0.70 (s)                                        | 14,8                | 0.65 (s)                                        | 14,6                |
| 25       | 0.86 (s)                                        | 18                  | 0.93 (s)                                        | 17,7                |
| 26       | 1.03 (s)                                        | 18,6                | 0.81 (s)                                        | 18,4                |
| 27       | 1.00 (s)                                        | 20,9                | 0.81 (s)                                        | 16,4                |
| 28       | 1.20 (s)                                        | 32,2                | 1.03 (s)                                        | 31,8                |
| 29       | 3.24 (sl)                                       | 74,9                |                                                 | 182,3               |
| 30       | 1.01 (s)                                        | 25,9                | 1.15 (s)                                        | 31,6                |



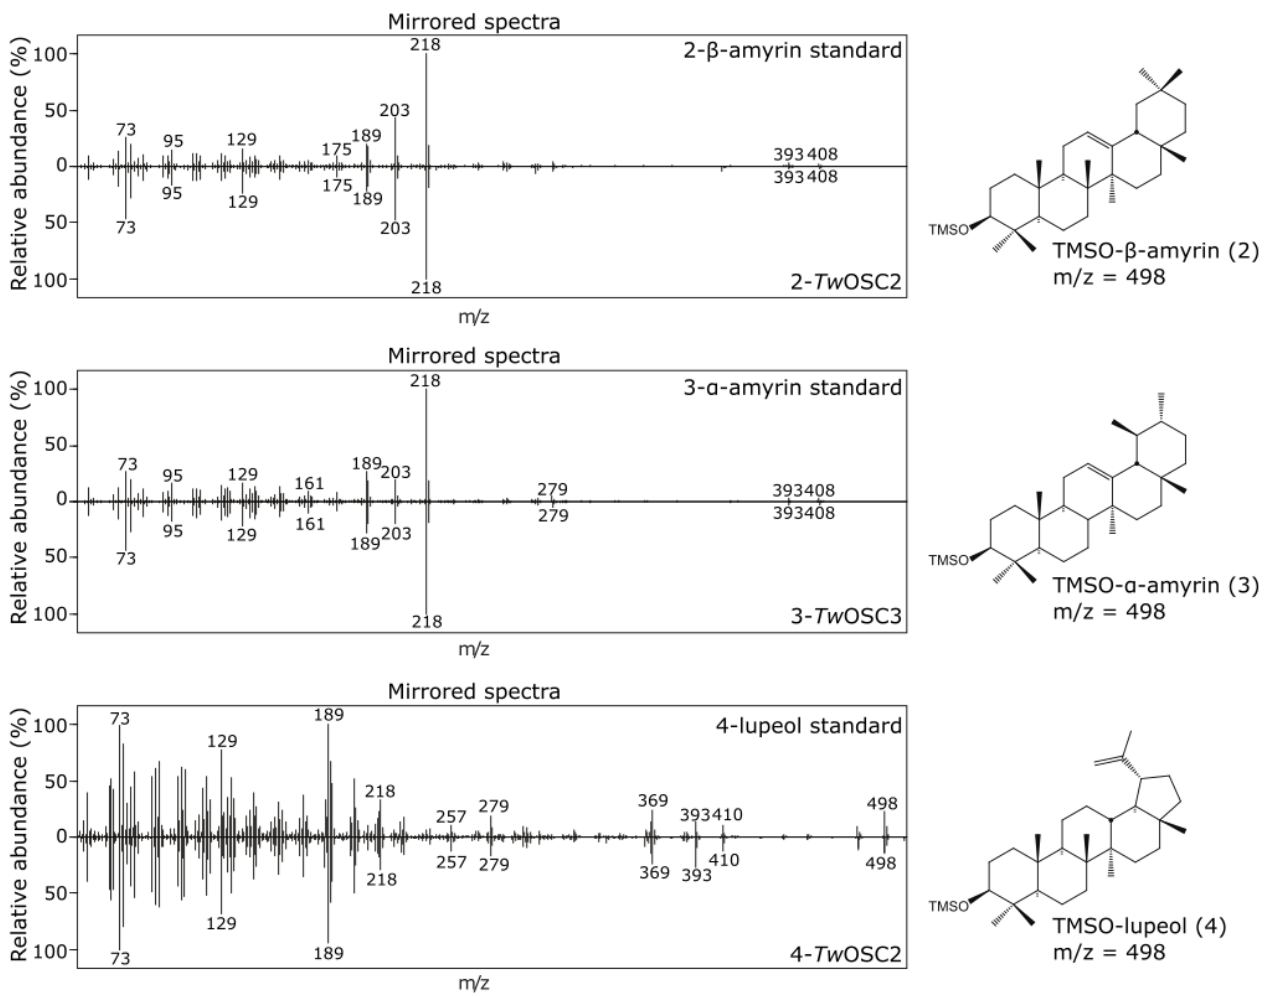

**Figure S1.** Comparison of the mass spectra of the TMS derivatized products of the *TwOSC* in tobacco leaf infiltration experiments with the spectra of TMS derivatized authentic standards.

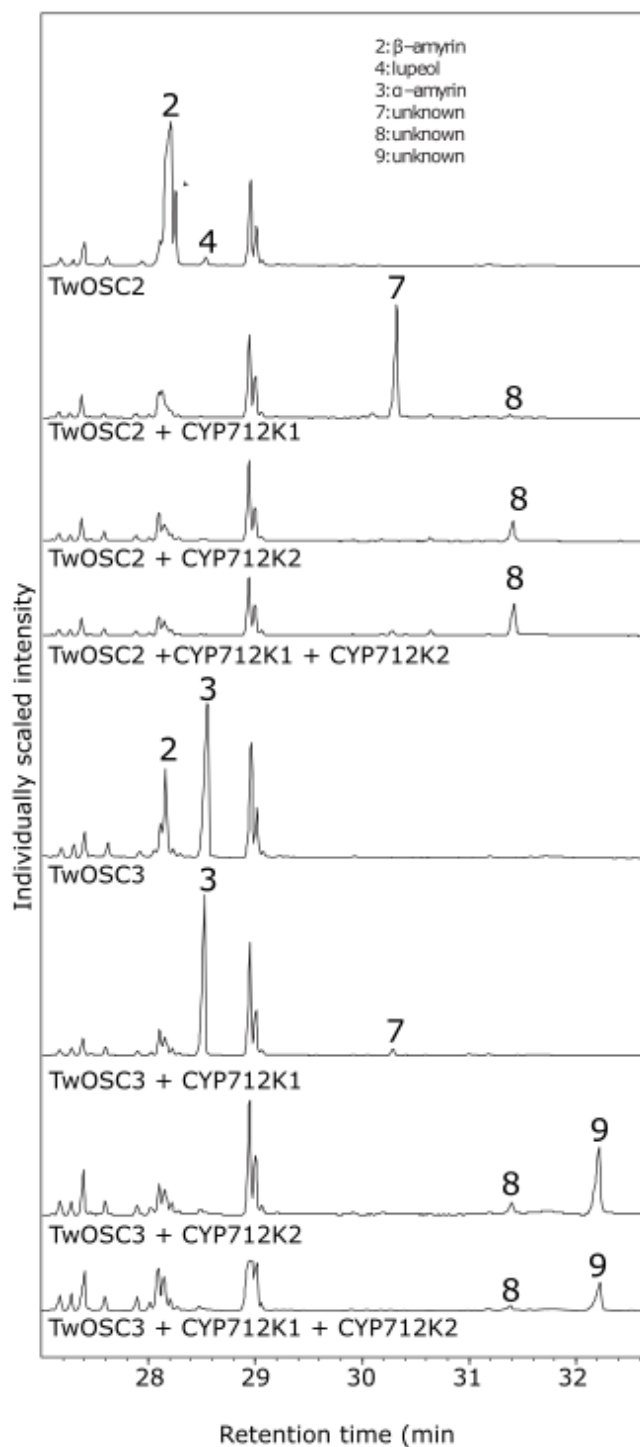

**Figure S2.** Transient expression of *T. wilfordii* CYP712K1 and CYP712K2 to monitor their ability to oxygenate the core structures produced by TwOSC2 and TwOSC3. Two leaf discs ( $\varnothing$ 3 cm) of leaves co-expressing the genes encoding the indicated enzymes were extracted in 1 mL ethyl acetate. A 0.15 mL aliquot of this extract was dried, TMS derivatized and analyzed by GC-MS. None of the novel peaks 7-9 had mass spectra or retention times matching any of the analyzed authentic standards (betulinic acid, hederagenin, or oleanolic acid; not shown).

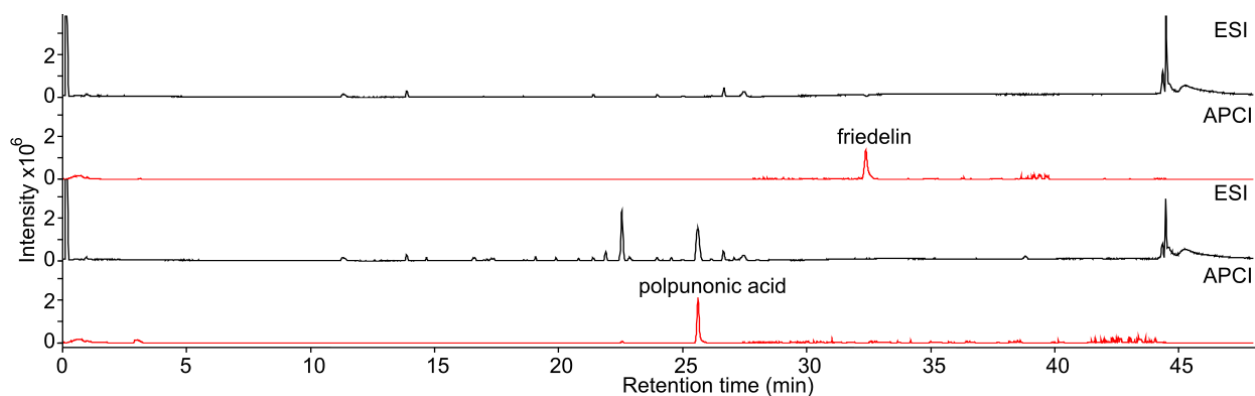

**Figure S3.** Comparison of LC-ESI-MS and LC-APCI-MS (base peak chromatogram) for the reliable quantification of friedelin and polpunonic acid standards. The same standards (30  $\mu\text{g}/\text{mL}$  of either friedelin or polpunonic acid) were analyzed using the same LC-MS equipment and program with the exception of ionization probe (ESI; black trace and APCI; red trace).
